# Supplementary material
Source: ML conference proceedings conference paper supplement (https://proceedings.neurips.cc/paper_files/paper/2023/hash/525d24400247f884c3419b0b7b1c4829-Abstract.html)
Supplement: Supplementary file 1 [file 525d24400247f884c3419b0b7b1c4829-Supplemental-Conference.zip]

Archive with 3 entries (3 files):
- SA3D-code.zip
- SA3D-supp.pdf
- SA3D_visualization.mp4
